# Supplementary material
Source: publisher figshare collection journal article supplement (https://acs.figshare.com/ndownloader/files/11666204)
Supplement: Supplementary file 1 [file 11666204]

# Supporting Information

## Gold Nanoparticle Chains: Synthesis, Characterization and Modelling Using Spectroscopic Ellipsometry

*Authors: Julien Vieaud,<sup>‡,§</sup> Jie Gao,<sup>‡</sup> Jérémy Cane,<sup>‡</sup> Michel Stchakovsky,<sup>‡</sup> Aotmane En Naciri,<sup>°</sup>  
Katsuhiko Ariga,<sup>§,¥</sup> Reiko Oda,<sup>‡</sup> Emilie Pouget<sup>\*‡</sup> and Yann Battie<sup>\*°</sup>*

<sup>‡</sup> Chimie et Biologie des Membranes et des Nanoobjets (CBMN), CNRS - Université Bordeaux -  
Bordeaux INP, UMR 5248, Allée St Hilaire, Bat B14, 33607 Pessac, France.

<sup>§</sup> WPI-MANA, National Institute for Materials Science (NIMS), 1-1 Namiki, Tsukuba, Ibaraki  
305-0044, Japan

<sup>¥</sup> Department of Advanced Materials Science, Graduate School of Frontier Sciences, The  
University of Tokyo, 5-1-5 Kashiwanoha, Kashiwa, Chiba 277-8561, Japan

<sup>‡</sup> Horiba Scientific, Avenue de la Vauve, Passage Jobin Yvon, 91120 Palaiseau, France.

<sup>°</sup> LCP-A2MC, Institut Jean Barriol, Université de Lorraine, 1 Bd Arago, 57070 Metz, France.

\* authors for correspondence: [e.pouget@cbmn.u-bordeaux.fr](mailto:e.pouget@cbmn.u-bordeaux.fr); [yann.battie@univ-lorraine.fr](mailto:yann.battie@univ-lorraine.fr)

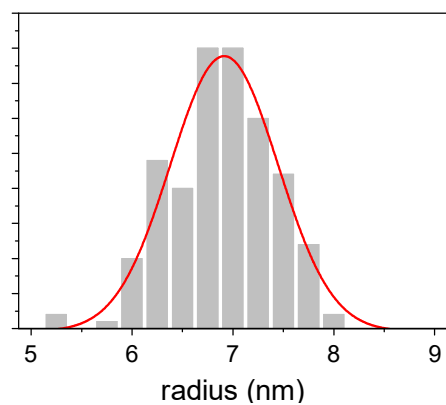

**Figure S1: Size distribution of the AuNPs. Statistics done on 207 measurements.**

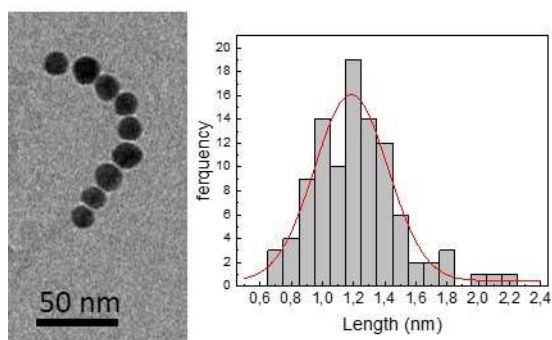

**Figure S2: cryoTEM image of S4 sample and the interparticle gap  $g$  distribution.**

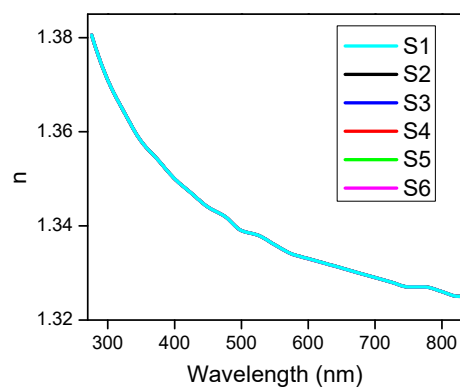

**Figure S3: Effective refractive index of colloidal suspensions determined by ellipsometry.**

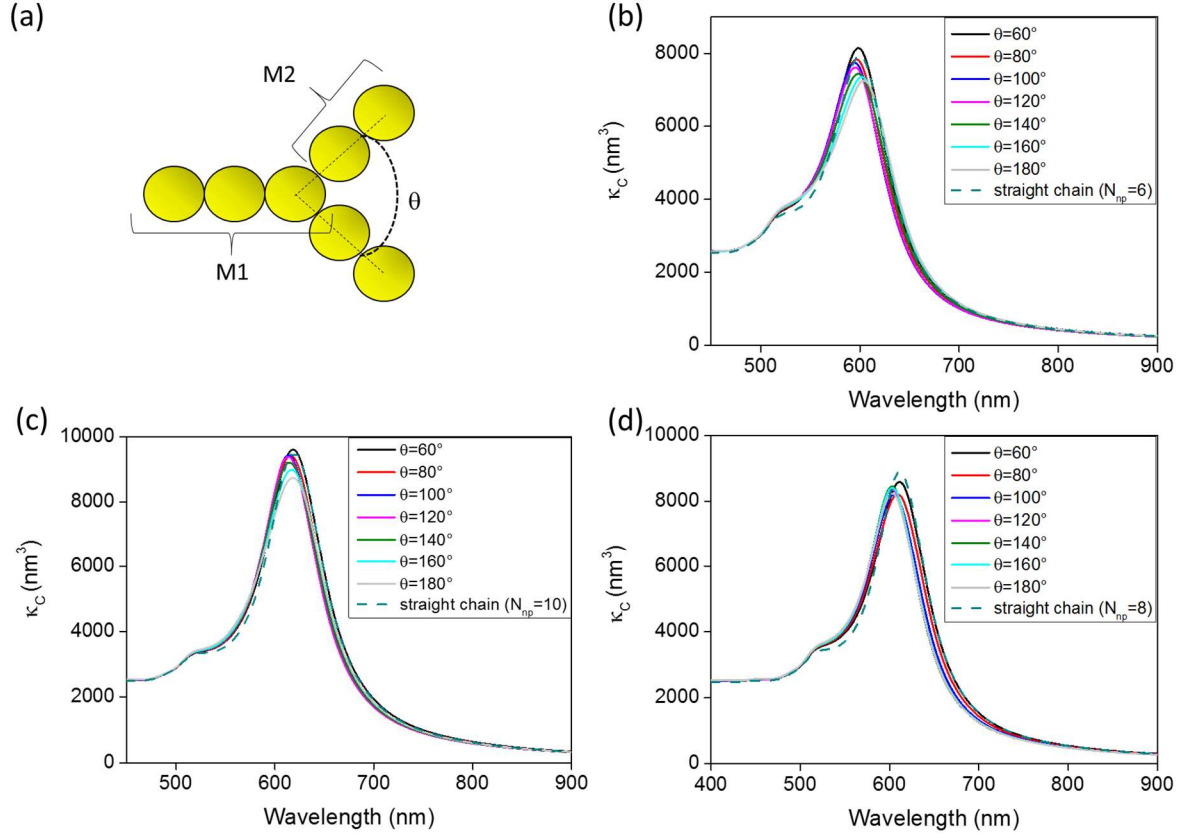

**Figure S4: (a) Schematic representation of the ramified chain structures considered in the simulations. Evolution of the extinction coefficient spectra with the angle between ramifications of (b) (3,3), (c) (5,5) and (d) (5,3) ramified chains. The spectra of straight chain composed of (b) 6, (c) 10 and (d) 8 NPs are also reported. The simulations are performed by considering NPs in conductive contact asymptotic limit. The NP radius is 7 nm and water is used as matrix.**

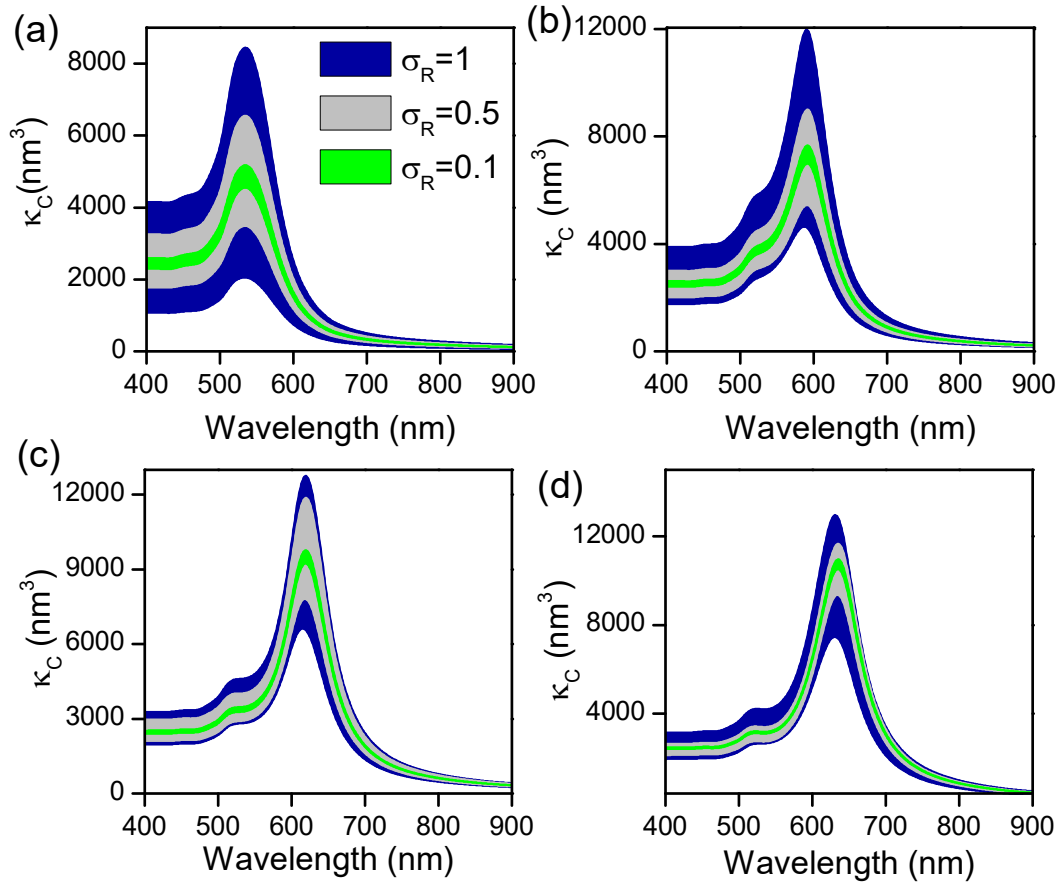

**Figure S5: influence of the standard deviation  $\sigma_R$  of NP radius distribution on the range in which the extinction coefficient of each individual NP chain can vary. The simulation are performed by considering chains composed of (a) 2, (b) 5, (c) 10 and (d) 20 NPs in conductive contact limit. The mean radius of NP is 7 nm and water is used as matrix.**

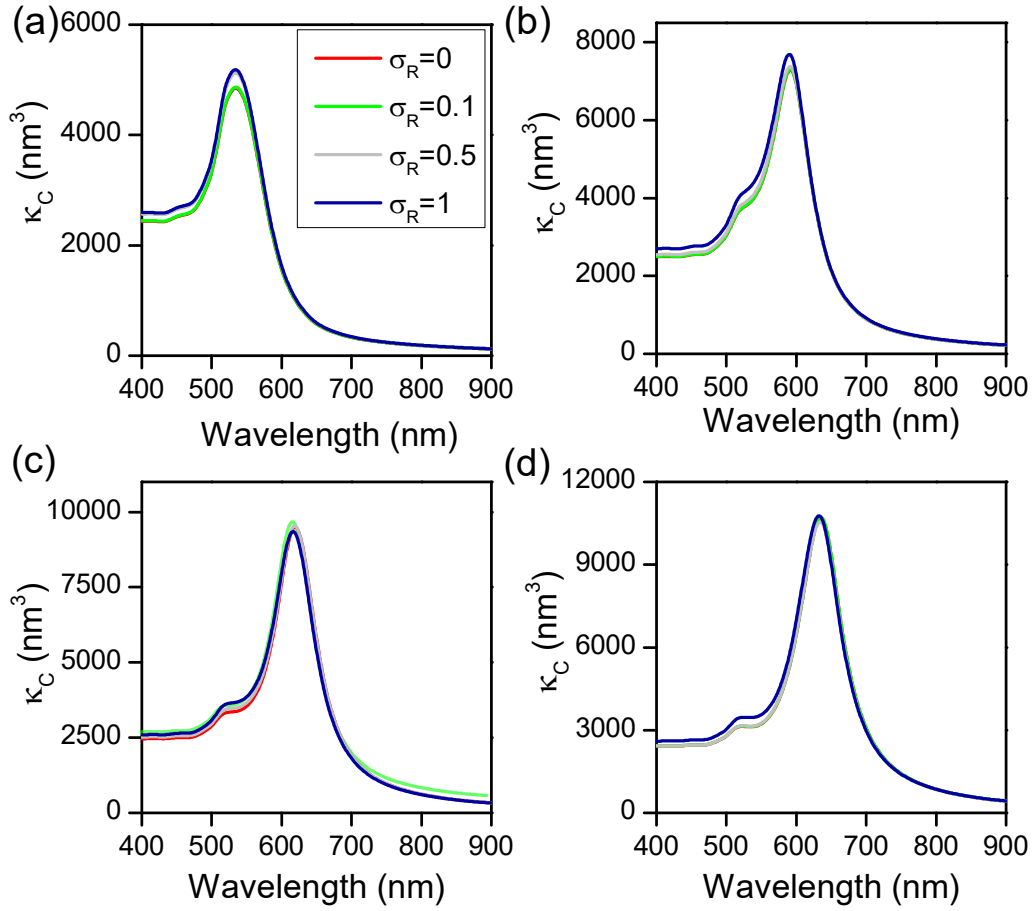

**Figure S6: influence of the standard deviation  $\sigma_R$  of NP radius on the extinction coefficient of suspensions which contain NP chains. The simulations are performed by considering chains composed of (a) 2, (b) 5, (c) 10 and (d) 20 NPs in conductive contact limit. The mean radius of NP is 7 nm and water is used as matrix.**
